# Supplementary material for: Bromodomain Protein Inhibitors Reorganize the Chromatin of Synovial Fibroblasts
Source: MDPI journal article supplement (doi:10.3390/cells12081149), 2023-04-13
Supplement: s1 [file s1]

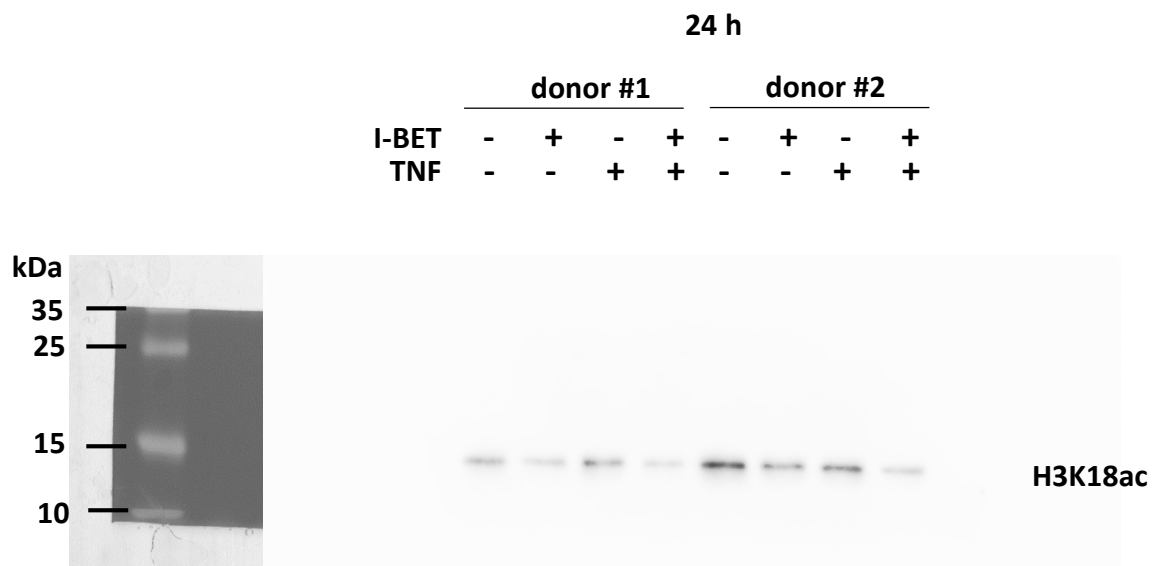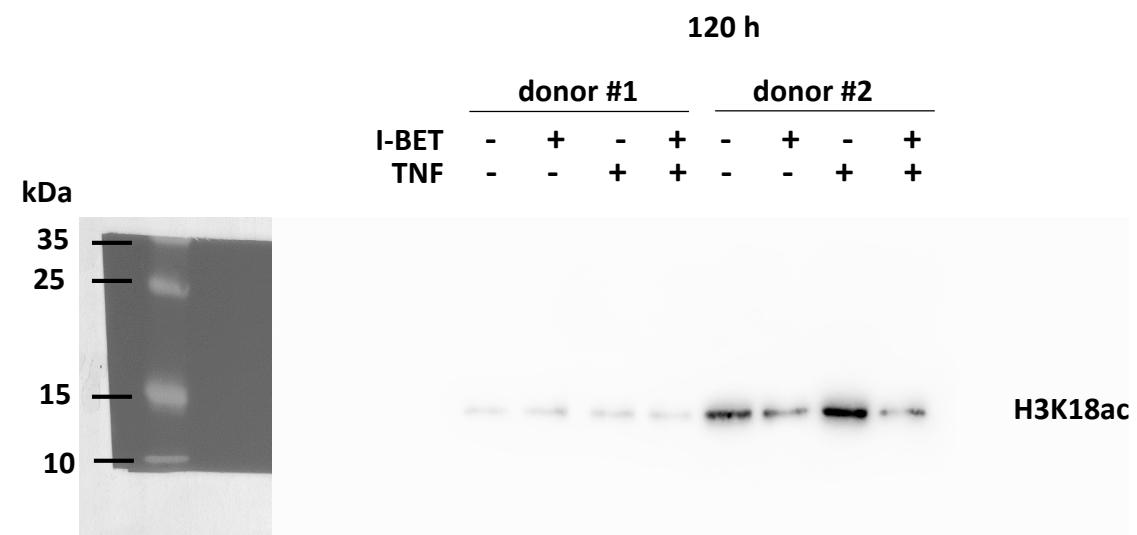

**Supplementary Figure S1**

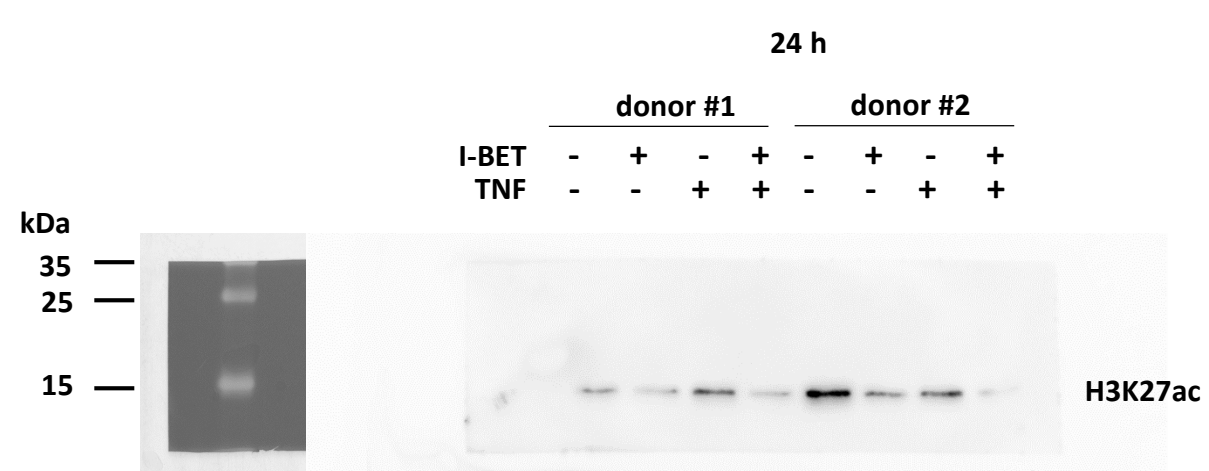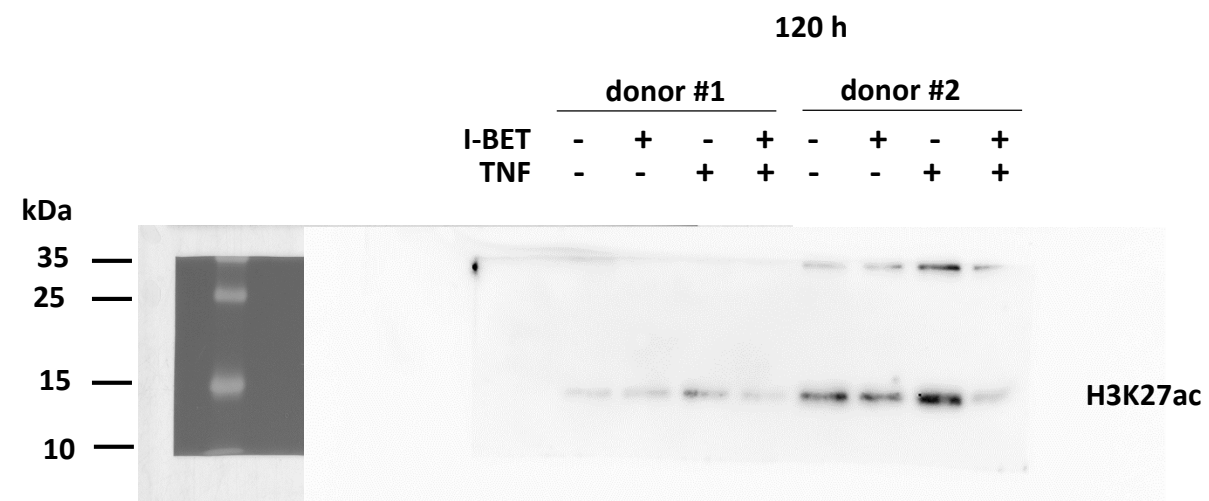

**Supplementary Figure S2**

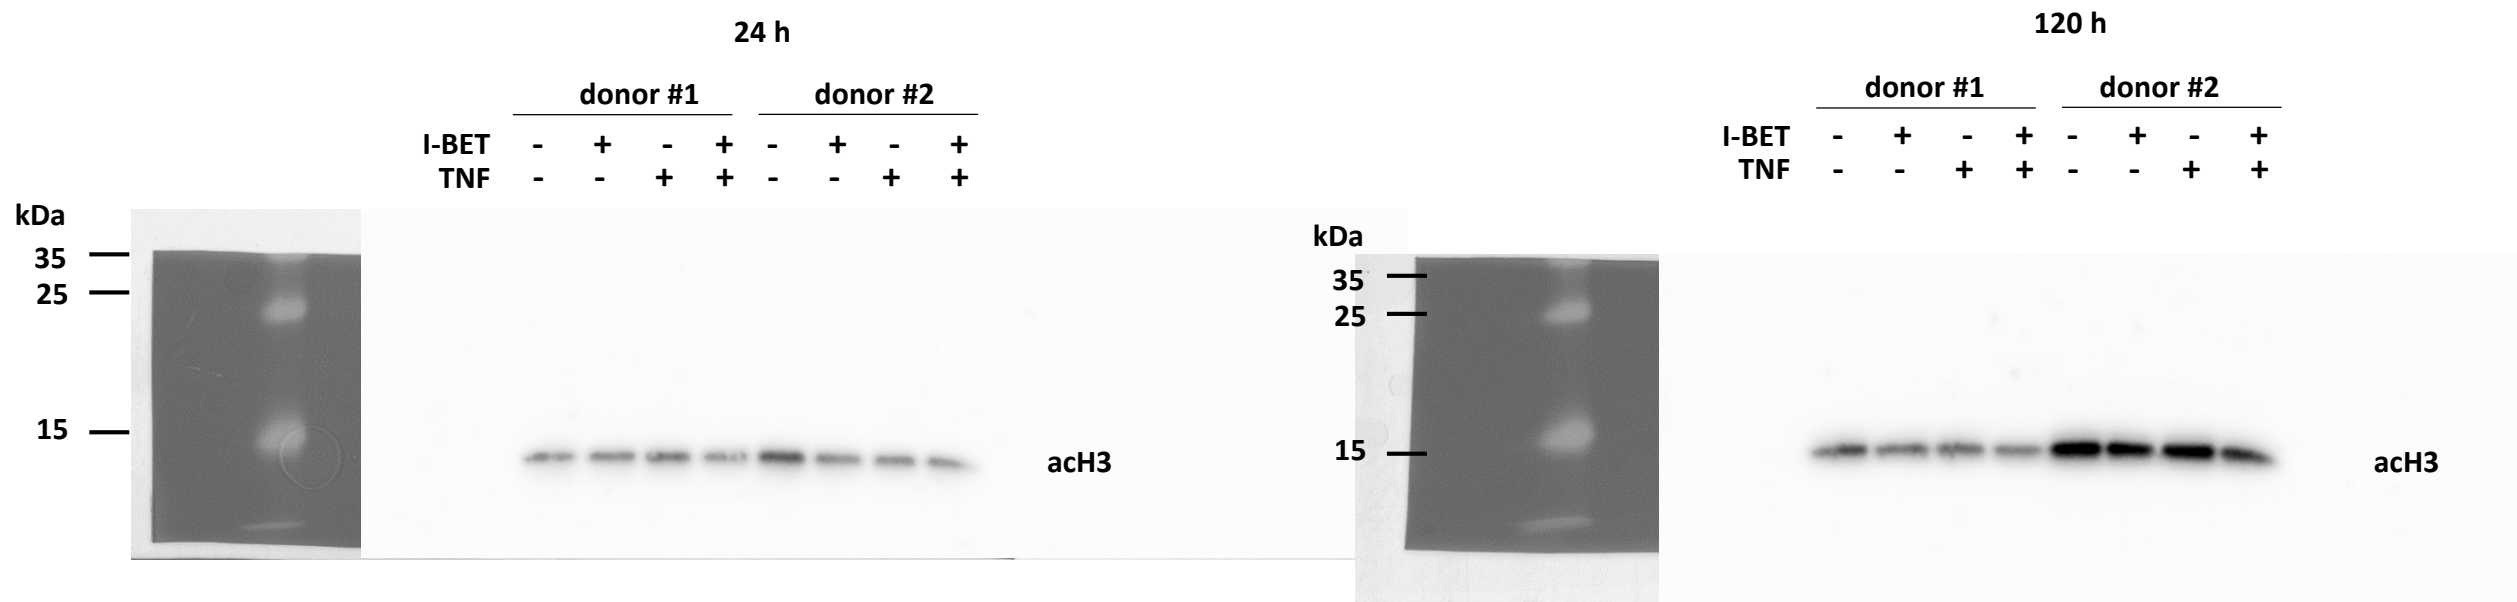

**Supplementary Figure S3**

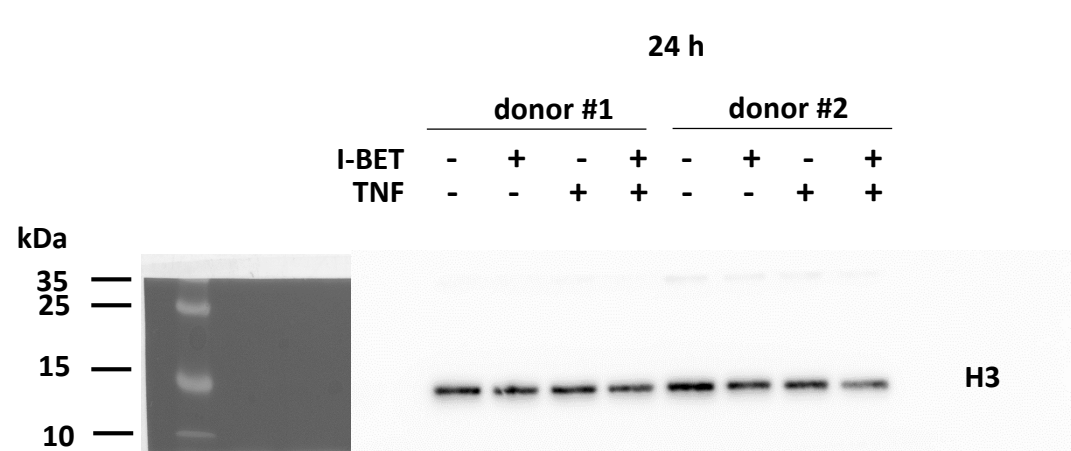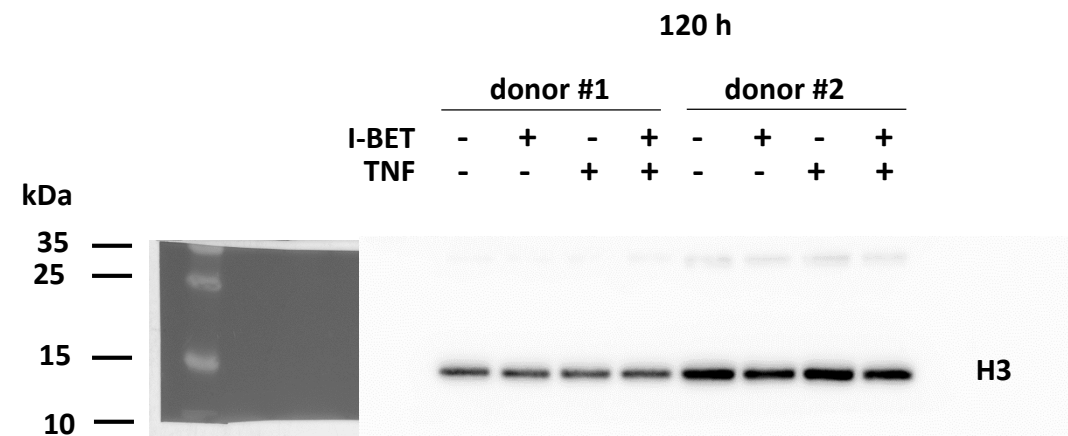

**Supplementary Figure S4**

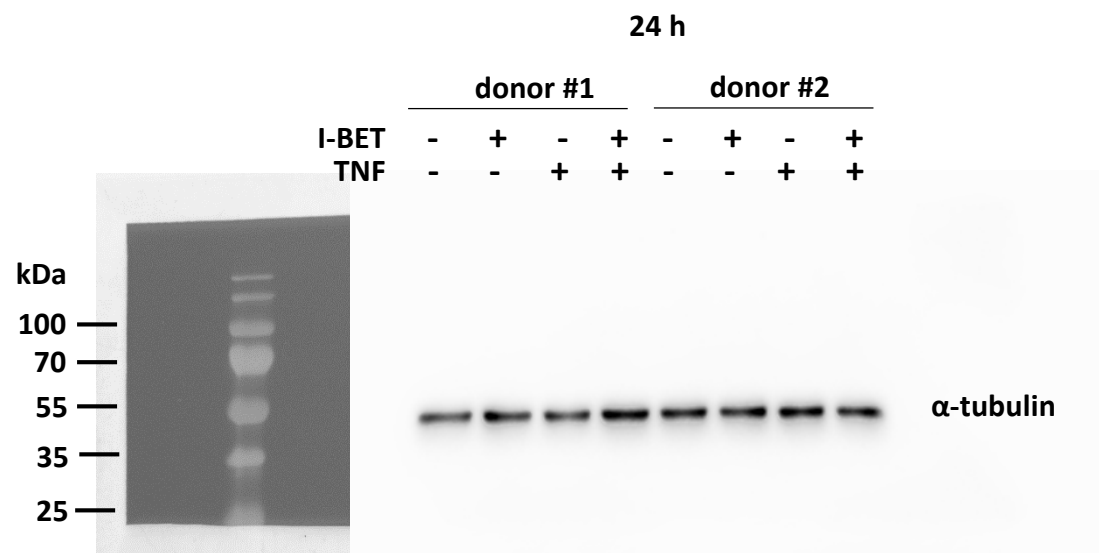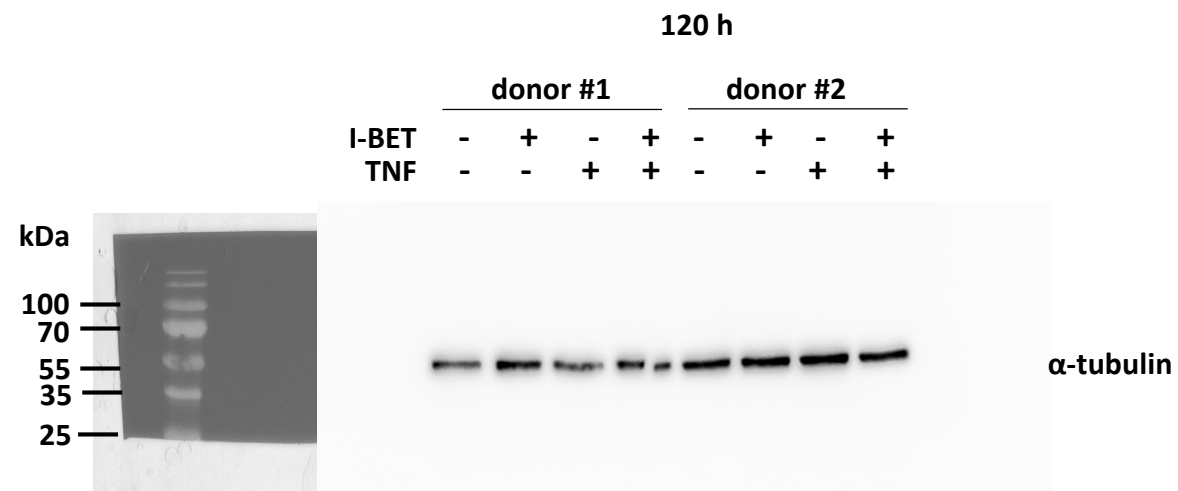

Supplementary Figure S5
